1 **Genetic structure of island and mainland populations of a Neotropical bumble bee**  
2 **species**

3

4 FLÁVIO O. FRANCISCO,<sup>1,2</sup> LEANDRO R. SANTIAGO,<sup>1</sup> YURI M. MIZUSAWA,<sup>1</sup>  
5 BENJAMIN P. OLDROYD<sup>2</sup> and MARIA C. ARIAS<sup>1</sup>

6

7 <sup>1</sup>*Departamento de Genética e Biologia Evolutiva, Instituto de Biociências, Universidade*  
8 *de São Paulo, Rua do Matão 277 – sala 320, São Paulo, SP 05508-090, Brazil*

9 <sup>2</sup>*Behaviour and Genetics of Social Insects Lab, School of Biological Sciences A12,*  
10 *University of Sydney, Sydney, NSW 2006, Australia*

11

12 Correspondence:

13 Flávio O. Francisco, Departamento de Genética e Biologia Evolutiva, Instituto de  
14 Biociências, Universidade de São Paulo, Rua do Matão 277 – sala 320, 05508-090, São  
15 Paulo, SP, Brazil

16 E-mail: fofrancisco@usp.br

17

18 Running title: Genetic structure of *B. morio*

19 **Abstract**

20 Biodiversity loss is a global problem and island species/populations are particularly  
21 vulnerable to such loss. Low genetic diversity is one of the factors that can lead a population  
22 to extinction. Loss of bee populations is of particular concern because of the knock-on  
23 consequences for the pollination guilds that the lost bees once serviced. Here we evaluate the  
24 genetic structure of the bumble bee *Bombus morio* populations on the mainland of South East  
25 Brazil and on nearby islands. We analyzed a total of 659 individuals from 24 populations by  
26 sequencing two mitochondrial genes (*COI* and *Cytb*) and using 14 microsatellite loci. Levels  
27 of diversity were high in most of populations and were similar on islands and the mainland.  
28 Furthermore, genetic diversity was not significantly correlated with island area, although it  
29 was lower in populations from distant islands. Our data suggest that long-term isolation on  
30 islands is not affecting the population viability of this species. This may be attributed to the  
31 high dispersal ability of *B. morio*, its capacity to survive in urban environments, and the  
32 characteristics of the studied islands.

33

34 **Key words.** Bombini, *Bombus morio*, islands, microsatellites, mtDNA, population genetics

## 35 **Introduction**

36 Islands often play important roles as natural laboratories for the study of ecology and  
37 evolution (MacArthur & Wilson 1967; Mayr 1967; Franks 2010). For example, the  
38 distribution of animals on islands and adjacent continents was central to the development of  
39 theories about speciation by isolation and natural selection (Darwin 1859; Wallace 1869).  
40 Currently, biodiversity loss is a global problem (Dirzo & Raven 2003; Stokstad 2006;  
41 Butchart *et al.* 2010; Bálint *et al.* 2011; Hooper *et al.* 2012; CBD 2013) and island species are  
42 of particular concern because most extinctions of mammal, bird and reptile species occurred  
43 on islands (Frankham 1997; Gaston 2009). Due to the complexity of ecological systems, the  
44 extinction of a species or population may also cause loss of important ecological interactions  
45 (Diamond 1984; Gaston 2009). Changes in predator-prey relationships, for example, can  
46 cause a cascade effect at lower trophic levels.

47 While humans have been the main cause of island extinctions through habitat  
48 destruction, direct predation, introduction of exotic species, and spread of disease (Frankham  
49 1998), island species/populations may become extinct due to the combination of natural  
50 demographic, environmental and genetic factors (Shaffer 1981). Genetic diversity of island  
51 populations is expected to be low due to bottlenecks, inbreeding and genetic drift (Wright  
52 1931; Mayr 1942; Frankham 1997). It is also expected that the size of an island, its distance  
53 from the mainland, and the time elapsed since its isolation will affect the biota's genetic  
54 diversity (Jaenike 1973; Frankham 1997). Low genetic diversity may precipitate extinction by  
55 decreasing reproduction and survival rates, and resistance to diseases (Ayala 1965; Frankham  
56 1998; Keller & Waller 2002; Whitehorn *et al.* 2011).

57 Bees are one of the most abundant and efficient pollinators and are, therefore, of  
58 particular conservation concern (Heard 1999; Cortopassi-Laurino *et al.* 2006; Steffan-  
59 Dewenter & Westphal 2008; Breeze *et al.* 2011). Absence of a single bee species can reduce

60 the effectiveness of pollination services (Brosi & Briggs 2013) and can have knock on effects  
61 at other trophic levels (Brosi *et al.* 2007). In bees, sex is determined by zygoty at a single  
62 sex-determining locus (Cook & Crozier 1995). Females arise from diploid, fertilized eggs that  
63 are heterozygous at the sex locus, whereas males arise from unfertilized eggs. However, in  
64 small or inbred populations, diploid individuals homozygous at the sex locus are produced  
65 and are male, but are either non-viable or infertile. Thus the effects of small population size,  
66 inbreeding and low genetic diversity are generally higher in bee populations than in  
67 comparable diploid organisms (Cook & Crozier 1995), increasing the bees' extinction  
68 proneness (Zayed & Packer 2005).

69 *Bombus morio* Swederus 1787 is a generalist and primitively eusocial bumble bee  
70 (Michener 2007). On average, workers are about 25 mm long, but there is wide within-colony  
71 variation (Garófalo, 1980). Its broad distribution is ill-defined but it is known from Buenos  
72 Aires (Argentina), Carabobo (Venezuela) and Lima (Peru) (Moure & Sakagami, 1962; Moure  
73 & Melo, 2012). In Brazil, it is most commonly found in areas of tropical forest and coastal  
74 vegetation (Moure & Sakagami, 1962). The intranidal population of *B. morio* consists of a  
75 queen and about 60-70 workers (Laroca, 1976; Garófalo, 1978). Like other species of this  
76 genus, they usually nest on the ground under bushes and plant debris or in cavities formed by  
77 rodents, birds and termites (Moure & Sakagami 1962; Laroca 1976; Silveira *et al.* 2002;  
78 Michener 2007). The swarming process in *B. morio* happens at least twice a year (Camillo &  
79 Garófalo, 1989). It is likely that *B. morio* has strong flight capability (Moure & Sakagami  
80 1962), but the dispersal range of the reproductives is currently unknown.

81 Brazil encompasses hundreds of continental islands (previously connected to the  
82 mainland) of varying size (Ângelo 1989). Up until 17,500 years ago when sea levels were  
83 more than 100 m below their current levels, these islands were connected to the mainland  
84 (Ângelo 1989; Corrêa 1996). Isolation of these islands both from each other and the mainland

85 occurred about 12,000 years ago (Suguio *et al.* 2005), providing a natural laboratory for  
86 studying the long-term effects of genetic isolation on bees (Rocha-Filho *et al.* 2013; Boff *et*  
87 *al.* 2014) and other species (Pellegrino *et al.* 2005; Graziotin *et al.* 2006; Bell *et al.* 2012).  
88 Here we evaluate the genetic structure of Brazilian *B. morio* populations on the mainland and  
89 on islands. If the level of genetic diversity on islands is significantly lower than that observed  
90 on the mainland, then this would indicate that isolation for extended periods erodes genetic  
91 diversity in these bees, potentially leading to local extinction. If, on the other hand, the genetic  
92 diversity of island populations is similar to that found in the mainland, then this would  
93 indicate that isolation, even for millennia, has not reduced genetic diversity or population  
94 viability of these bees.

95

96

## 97 **Materials and methods**

### 98 *Sampled areas*

99 We made collections from island and mainland sites as described in Table S1. Islands ranged  
100 in size from 1.1 to 451 km<sup>2</sup> and are 0.1 to 38 km from the mainland (Figure 1, Table 1). We  
101 studied 10 continental islands (previously connected to the mainland) and one sedimentary  
102 island (Ilha Comprida) which arose about 5,000 years ago (Suguio *et al.* 2003).

103 We collected 704 bees from 368 sites in Santa Catarina (SC), Paraná (PR), São Paulo  
104 (SP), Rio de Janeiro (RJ), and Minas Gerais (MG) states (Figure 1, Table S1). Samples  
105 collected in nearby cities or on the same island were grouped into the same population. In all,  
106 samples were grouped in 24 populations (Figure 1, Table 1). Bees were sampled on flowers  
107 and preserved in 96% ethanol. For DNA extraction we used one middle leg per bee. The legs  
108 were dried at room temperature for 20 min right before DNA extraction according to Walsh *et*  
109 *al.* (1991).

110

111 *Mitochondrial DNA sequencing*

112 Two mitochondrial genes were partially sequenced: cytochrome c oxidase subunit 1 (*COI*)  
113 and cytochrome b (*Cytb*). Details about amplification and sequencing are given in Francisco  
114 *et al.* (2014).

115

116 *Microsatellite genotyping*

117 We analyzed 14 microsatellite loci, 12 specific: BM1, BM3, BM4, BM5, BM7, BM9, BM10,  
118 BM11, BM12, BM13, BM17, and BM18 (Molecular Ecology Resources Primer Development  
119 Consortium *et al.* 2012) and two designed from *B. terrestris*: BT01 and BT06 (Funk *et al.*  
120 2006). Amplification conditions of BT01 and BT06 were the same as described for BM  
121 primers, and their annealing temperatures were 48 °C and 54 °C, respectively.  
122 Electrophoresis, visualization and genotyping were performed according to Francisco *et al.*  
123 (2011).

124 MICRO-CHECKER 2.2.3 (van Oosterhout *et al.* 2004) was used to verify null alleles and  
125 scoring errors. COLONY 2.0.1.7 (Jones & Wang 2010) was used to verify whether individuals  
126 collected in the same plant or places nearby (less than 5 km) were related. GENEPOP 4.1.2  
127 (Rousset 2008) was used to verify Hardy-Weinberg equilibrium (HWE) in populations and  
128 loci and to detect linkage disequilibrium (LD). Markov chain was set for 10,000  
129 dememorizations, 1,000 batches and 10,000 iterations per batch. In cases of multiple  
130 comparisons *P*-values were corrected by applying Sequential Goodness of Fit test by the  
131 program SGOF 7.2 (Carvajal-Rodríguez *et al.* 2009).

132

133 *Genetic diversity*

134 ARLEQUIN 3.5.1.3 (Excoffier & Lischer 2010) was used to calculate mitochondrial DNA  
135 (mtDNA) haplotype ( $h$ ) and nucleotide ( $\pi$ ) diversity. GENALEX 6.5 (Peakall & Smouse 2006,  
136 2012) was used to calculate microsatellite allelic richness and expected heterozygosity ( $H_E$ ).  
137 Since sample sizes were different, allelic richness was standardized ( $Ar$ ) by rarefaction using  
138 the program HP-RARE 1.0 (Kalinowski 2005). Differences in  $Ar$  among populations were  
139 estimated by Mann-Whitney two-tailed U Test. The inbreeding coefficient ( $F_{IS}$ ) was  
140 calculated for each population with 10,000 permutations by ARLEQUIN.

141

#### 142 *Population differentiation*

143 The program MEGA 5.2.1 (Tamura *et al.* 2011) was used to calculate the number of base  
144 substitutions per site from averaging over all sequence pairs between populations using the  
145 Kimura 2-parameter (K2p) model (Kimura 1980). Global Jost's  $D_{est}$  (Jost 2008) was  
146 calculated with 9,999 permutations for mtDNA and microsatellite data by GENALEX. Mantel  
147 tests between genetic and geographical distances were performed with 9,999 permutations by  
148 GENALEX to verify isolation by distance.

149       Spatially clustering of individuals based on microsatellite data and the geographic  
150 coordinates was performed by BAPS 6 (Corander *et al.* 2008; Cheng *et al.* 2013). The program  
151 was initially ran 5 times for each of  $K = 1$  to 20 and then 10 times for each of  $K = 1$  to 11.  
152 These results were used for admixture analysis with 200 iterations to estimate the admixture  
153 coefficients for the individuals, 200 simulated reference individuals per population and 20  
154 iterations to estimate the admixture coefficients of the reference individuals.

155

156

## 157 **Results**

158 *Sample size*

159 We visited 11 islands and found *B. morio* on all of them except Ilha Monte de Trigo. When a  
160 bee was collected <5 km away from another bee in the collection, we determined if the two  
161 bees could possibly have come from the same colony or a different colony. If COLONY  
162 indicated that the two specimens could be sisters, and the two bees shared the same mtDNA  
163 haplotype we discarded one of the pair from all subsequent analyses. Overall, from the 704  
164 bees sampled, we used 659 for population analyses (Table 1).

165

#### 166 *MtDNA diversity*

167 Typically, we obtained 392 bp of sequence from the *COI* gene (GenBank accession numbers  
168 KM505163-KM505866) and identified 33 haplotypes. We generated 403 bp of sequence from  
169 the *Cytb* gene had (KM505867-KM506570) and detecting 53 haplotypes. We used the  
170 concatenated sequences (795 bp) for all population analyses. All 659 sequences from the 24  
171 populations generated 100 haplotypes (Table S2). The number of haplotypes per population  
172 ranged from 1 (Ilha da Vitória) to 23 (Angra dos Reis) (Table 1). Since  $h$  and  $\pi$  are correlated  
173 ( $r = 0.881$ ,  $P < 0.001$ ,  $n = 24$ ) we hereafter use  $\pi$  as our measure of mtDNA diversity. High  
174 mtDNA diversity was found in all populations but Ilha da Vitória and Teodoro Sampaio  
175 (Table 1).

176 For mainland populations, mtDNA diversity was not significantly correlated with  
177 sampling area ( $r = -0.074$ ,  $P = 0.731$ ,  $n = 14$ ) or median elevation ( $r = -0.034$ ,  $P = 0.876$ ,  $n =$   
178 14). For island populations, mtDNA diversity was not significantly correlated to island area ( $r$   
179  $= 0.475$ ,  $P = 0.166$ ,  $n = 10$ ), but it was negatively correlated to the distance from the mainland  
180 ( $r = -0.748$ ,  $P = 0.013$ ,  $n = 10$ ).

181

#### 182 *Microsatellite diversity*

183 After the Sequential Goodness of Fit correction, locus BT01 showed significant deviation



184 from HWE in Ilha de São Sebastião ( $P = 0.004$ ) and Prudentópolis ( $P = 0.005$ ). Loci BM9  
185 and BM17 showed deviation from HWE in Apiaí ( $P = 0.007$ ) and Ilha Comprida ( $P = 0.001$ ),  
186 respectively. Since those were occasional instances, no locus was removed from analyses. No  
187 significant LD was found between any pair of loci (all  $P > 0.05$ ).

188         The number of alleles per locus ranged from four to 26, with an average of  $14.1 \pm 1.6$   
189 (Table S3). Mean  $H_E$  was  $0.75 \pm 0.04$ .  $A_r$  was standardized for 5 individuals and ranged from  
190 3.3 (Ilha da Vitória) to 4.9 (Ilha Anchieta) (Table 1). Ilha da Vitória and Teodoro Sampaio  
191 also showed the lowest  $A_r$  and  $H_E$  values (Table 1).  $A_r$  was not significantly different between  
192 Ilha da Vitória and Teodoro Sampaio ( $U = 86$ ,  $P = 0.0581$ ), but it was between these two  
193 populations and the others ( $U < 47$ ,  $P < 0.05$ ).  $A_r$  and  $H_E$  were positively correlated ( $r =$   
194  $0.936$ ,  $P < 0.001$ ) and  $A_r$  will be used as indicative of microsatellite diversity hereafter.

195         As observed for mtDNA data, microsatellite diversity of mainland populations was not  
196 significantly correlated with sampling area ( $r = -0.171$ ,  $P = 0.424$ ,  $n = 14$ ) or median elevation  
197 ( $r = -0.031$ ,  $P = 0.884$ ,  $n = 14$ ). Microsatellite diversity of island populations was not  
198 significantly correlated to island area ( $r = 0.284$ ,  $P = 0.427$ ,  $n = 10$ ), but it was negatively  
199 correlated to the distance from the mainland ( $r = -0.885$ ,  $P = 0.001$ ,  $n = 10$ ).

200         Nine populations had  $F_{IS}$  significantly greater than zero ( $P < 0.05$ ); five from the  
201 mainland (Angra dos Reis, Apiaí, Prudentópolis and Teodoro Sampaio) and four from islands  
202 (Ilha Grande, Ilha de São Sebastião, Ilha Comprida and Ilha do Mel). The highest  $F_{IS}$  (0.10)  
203 was found in Teodoro Sampaio.

204

#### 205 *Diversity between mainland and islands*

206 Populations were grouped according to their location: mainland or islands (Table 1). MtDNA  
207 diversity was higher in populations from the mainland ( $0.0435 \pm 0.0263$ ) than populations  
208 from the islands ( $0.0370 \pm 0.0236$ ).  $A_r$  was standardized for 260 individuals and populations

209 from the mainland showed high diversity (12.65), followed by islands (11.71). Mann-Whitney  
210 two-tail U Test showed no significant differences among  $A_r$  values ( $U = 105$ ,  $P = 0.748$ ).

211

### 212 *MtDNA differentiation*

213 Forty seven of the 100 concatenated haplotypes were shared by two or more populations.

214 We built a haplotype network where the frequency and distribution of haplotypes are shown

215 (Figure S1). The network features a high number of interrelationships among the haplotypes

216 and that a striking number of nucleotide substitutions separate the Teodoro Sampaio

217 population from the others.

218 Global  $D_{est}$  was 0.344 ( $P < 0.001$ ). The highest differentiation based on K2p was

219 between the Teodoro Sampaio population relative to all other populations (2.106% to

220 2.512%) (Table 2). Teresópolis also showed substantial divergence from other populations.

221 Mostly, however, populations were poorly differentiated. Mantel tests showed a significant

222 positive correlation between geographic and K2p distances ( $r = 0.259$ ,  $P = 0.046$ ,  $n = 276$ ).

223

### 224 *Microsatellite differentiation*

225 Global  $D_{est}$  was low (0.071,  $P < 0.001$ ). Pairwise comparisons also detected low population

226 structure, since most of  $D_{est}$  values were low (Table 3). Highest values were detected between

227 the Teodoro Sampaio and Ilha da Vitória populations relative to all other populations (0.218

228 to 0.385). Pairwise  $D_{est}$  was not significantly correlated with geographic distances ( $r = 0.210$ ,

229  $P = 0.070$ ,  $n = 276$ ). The spatial cluster approach used by BAPS determined  $K = 2$  as the most

230 likely optimal number of clusters (probability of 99.99%) (Figure 1).

231

232

## 233 **Discussion**

234 The genetic diversity of *B. morio* populations is similar on mainland and island sites.  
235 Furthermore, genetic diversity is not significantly correlated with island area, although it is  
236 lower in populations from islands that are more distant from the mainland. It is noteworthy that  
237 *B. morio* shows limited genetic divergence between island and mainland populations and  
238 among most of the mainland sampling sites. We suggest that the dispersal ability of *B. morio*  
239 combined with its capacity to live in urban environments, and the characteristics of the  
240 studied islands explain the genetic structure of the Brazilian populations.

241 The dispersal of *B. morio* is intimately related to its nesting and reproductive behavior.  
242 Colony reproduction in *Bombus* begins when a young queen leaves the mother nest alone and  
243 is fertilized by a male. Males and queens may have multiple partners, though this is rare for  
244 queens (Garófalo *et al.* 1986; Estoup *et al.* 1995). The mated queen begins to look for a  
245 suitable place to build the new nest. Once a nest site is found, the queen starts oviposition and  
246 performs all activities, such as foraging, cell provisioning and feeding the larvae (Garófalo  
247 1979). When workers emerge, labor division is set (Michener 2007) and the queen never  
248 leaves the nest again (Laroca 1976). The lack of dependence on the mother nest means that  
249 daughter colonies can be established a considerable distance from the natal nest. In Europe,  
250 *Bombus* queens have been observed several kilometers off shore over water (Macfarlane &  
251 Gurr 1995; Widmer *et al.* 1998; Darvill *et al.* 2010). In New Zealand, queens of *B. terrestris*  
252 colonized islands up to 30 km from the mainland (Macfarlane & Gurr 1995).

253 Our data suggest that both female and male *B. morio* have high dispersal abilities,  
254 although males have higher. Some population structure and isolation by distance were  
255 detected in the mitochondrial analyses, but our microsatellite data showed negligible genetic  
256 structure even over distances exceeding 1,000 km. The homogeneity of *Bombus* populations  
257 has also been observed in European and North American populations (Estoup *et al.* 1996;  
258 Ellis *et al.* 2006; Lozier & Cameron 2009; Lozier *et al.* 2011). In *B. terrestris*, males can fly

259 up to 10 km, including over water (Kraus *et al.* 2009). Most likely, long distance dispersal  
260 allows *B. morio* to minimize the effects of isolation on islands.

261 *Bombus morio* was easily found at all mainland locations, even in urban environments.  
262 *Bombus* can commonly be seen visiting flowers along roadsides (Lozier *et al.* 2011),  
263 including *B. morio* (personal observations). In Europe and North America several bumble bee  
264 species are common in urban environments because the gardens and parks provide a diversity  
265 and abundance of flowers throughout the breeding season (Chapman *et al.* 2003; Goulson  
266 2010; Lozier *et al.* 2011). Similarly, *B. morio* thrives in Brazilian urban environments, and  
267 this ecological capacity no doubt contributes to its dispersal.

268 The vast majority of island and mainland populations of *B. morio* have moderate/high  
269 nuclear genetic diversity. In contrast, studies of other *Bombus* species on islands have found  
270 high differentiation and low genetic diversity (Estoup *et al.* 1996; Widmer *et al.* 1998; Shao *et*  
271 *al.* 2004; Darvill *et al.* 2006, 2010; Schmid-Hempel *et al.* 2007; Goulson *et al.* 2011; Lye *et*  
272 *al.* 2011; Lozier *et al.* 2011; Moreira *et al.* 2015). This discrepancy may be due to the fact the  
273 islands studied here are closer to the mainland than in the other studies. When we visited the  
274 most isolated islands we found low genetic diversity (Ilha da Vitória) or absence of bumble  
275 bees (Ilha Monte de Trigo).

276 The failure in collecting *B. morio* on Ilha Monte de Trigo may be due to any of the  
277 following: insufficient collection effort, ancestral absence from the island when it was  
278 isolated, or its extinction after isolation. Our collection effort was eight hours, so it is not  
279 possible to assert that the species does not occur on this island, although this amount of time  
280 was sufficient to find *B. morio* on all other islands. Its distance from the mainland, 10.2 km,  
281 may prevent queen (re)colonization. Nonetheless, *B. morio* is present on Ilha da Vitória, a  
282 more distant island (38 km from the mainland and 11 km from the nearest island). We only  
283 found five bees on Ilha da Vitória and its population showed low genetic diversity, suggesting

284 that the Ilha da Vitória population is small and may be threatened. Interestingly, the  
285 population of the orchid bee *Euglossa cordata*, which like *B. morio*, has good dispersal  
286 abilities, from Ilha da Vitória has low genetic diversity and is strongly differentiated from  
287 adjacent populations, both on the nearby islands Ilha de Búzios and Ilha de São Sebastião and  
288 from those on the mainland (Boff *et al.* 2014).

289 *Bombus morio* mitochondrial genetic diversity is high, except in Ilha da Vitória and  
290 Teodoro Sampaio. Many populations had  $h > 0.9$ . In fact, bees collected off the same flower  
291 or plant often had different haplotypes. Chapman *et al.* (2003) also observed that both *B.*  
292 *terrestris* and *B. pascuorum* workers visiting the same plant are often from different colonies.  
293 This high genetic diversity also suggests that populations of *B. morio* did not experience  
294 genetic bottlenecks during the Pleistocene. Indeed, *Bombus* species have some characteristics  
295 as robustness, hairiness and thermoregulatory adaptations that allow them to survival in  
296 temperate and cold regions (Hines 2008).

297 For both markers, the island populations and its nearby mainland populations are  
298 undifferentiated, most likely because of frequent migration. For example, the Ilha da Vitória  
299 population is not differentiated from Ilha de Búzios, the nearest island, with respect to  
300 mitochondrial haplotypes. The single haplotype found on Ilha da Vitória (H3) is the most  
301 common on Ilha de Búzios, and is also found on all other populations studied, except Teodoro  
302 Sampaio. Although it is possible that this haplotype is a relict of the ancestral population  
303 formed at the time of isolation, it is more likely that it is a result of a more recent colonization  
304 by queens from Ilha de Búzios.

305 Inbreeding is not a current concern for the island populations we studied. Although  $F_{IS}$   
306 was significantly different from zero on three island populations,  $F_{IS}$  was high only on Ilha  
307 Comprida. However, this population has high genetic diversity and is not genetically isolated,  
308 so the high  $F_{IS}$  is likely to be eroded with time.

309 Both markers indicated low genetic diversity in the Teodoro Sampaio population and  
310 high differentiation between Teodoro Sampaio and the other populations. Genetic drift may be  
311 the primary driver of this result. The Teodoro Sampaio population did not share haplotypes  
312 with any other population, whereas other populations all shared at least one haplotype. In  
313 addition, haplotypes are very similar, being distinguished by only one nucleotide in most  
314 cases. The percentage of variable sites between Teodoro Sampaio and other populations (from  
315 2.065 to 2.454%) was higher than that seen among all other populations, whose maximum  
316 value was 0.554% (São Sebastião × Teresópolis). The significant genetic divergence of the  
317 Teodoro Sampaio population from all others suggests that this population is a subspecies of *B.*  
318 *morio*.

319 To our knowledge, this is the first comparative study of the genetic architecture of  
320 mainland and island populations of a Neotropical bumble bee species. Our study shows that  
321 even in a highly fragmented landscape *B. morio* survives in urban environments and enjoys a  
322 high level of genetic diversity. This suggests *B. morio* populations are self-sustaining, and that  
323 this species will remain as an important pollinator in Brazil.

324

325

### 326 **Acknowledgments**

327 We are grateful to Paulo Henrique P. Gonçalves for his help with the sampling and to Susy  
328 Coelho and Julie Lim for technical assistance. We thank Adilson de Godoy, Carlos Chociai,  
329 Flávio Haupenthal, Geraldo Moretto, Marcos Wasilewski, Marcos Antonio, Renato Marques,  
330 José Moisés, André Trindade, Teófilo, Eduardo da Silva, Guaraci Cordeiro, Marcos Fujimoto,  
331 PC Fernandes, Samuel Boff, Thaiomara Alves, the managers and the staff of the Parks, the  
332 residents of Ilha da Vitória, Ilha de Búzios and Ilha Monte de Trigo, and countless people  
333 who assisted us in the fieldwork. We thank Dr. Jeffrey Lozier for comments on an early

334 version of this manuscript. For permits, we thank Instituto Brasileiro do Meio Ambiente e dos  
335 Recursos Naturais Renováveis (IBAMA) and Instituto Chico Mendes de Conservação da  
336 Biodiversidade (ICMBio) (18457-1), Instituto Florestal do estado de São Paulo (260108 -  
337 000.000.002.517/0 2008), Instituto Ambiental do estado do Paraná (128/09) and Instituto  
338 Estadual do Ambiente do Rio de Janeiro (E-07/300.011/0). This work was supported by  
339 Fundação de Amparo à Pesquisa do Estado de São Paulo (04/15801-0; 08/07417-6; 08/08546-  
340 4; 10/18716-4; 10/50597-5) and Australian Research Council. This work was developed in the  
341 Research Center on Biodiversity and Computing (BioComp) of the Universidade de São  
342 Paulo (USP), supported by the USP Provost's Office for Research.

343 **References**

- 344 Ângelo S (1989) *Ilhas do Litoral Paulista*. Secretaria do Meio Ambiente - SMA, São Paulo.
- 345 Ayala FJ (1965) Evolution of fitness in experimental populations of *Drosophila serrata*.  
346 *Science*, **150**, 903–905.
- 347 Bálint M, Domisch S, Engelhardt CHM *et al.* (2011) Cryptic biodiversity loss linked to global  
348 climate change. *Nature Climate Change*, **1**, 313–318.
- 349 Bell RC, Brasileiro CA, Haddad CFB, Zamudio KR (2012) Evolutionary history of *Scinax*  
350 treefrogs on land-bridge islands in south-eastern Brazil. *Journal of Biogeography*, **39**,  
351 1733–1742.
- 352 Boff S, Soro A, Paxton RJ, Alves-dos-Santos I (2014) Island isolation reduces genetic  
353 diversity and connectivity but does not significantly elevate diploid male production in a  
354 neotropical orchid bee. *Conservation Genetics*, **15**, 1123–1135.
- 355 Breeze TD, Bailey AP, Balcombe KG, Potts SG (2011) Pollination services in the UK: How  
356 important are honeybees? *Agriculture, Ecosystems and Environment*, **142**, 137–143.
- 357 Brosi BJ, Briggs HM (2013) Single pollinator species losses reduce floral fidelity and plant  
358 reproductive function. *Proceedings of the National Academy of Sciences of the United*  
359 *States of America*, **110**, 13044–13048.
- 360 Brosi BJ, Daily GC, Ehrlich PR (2007) Bee community shifts with landscape context in a  
361 tropical countryside. *Ecological Applications*, **17**, 418–430.
- 362 Butchart SHM, Walpole M, Collen B *et al.* (2010) Global biodiversity: indicators of recent  
363 declines. *Science*, **328**, 1164–1168.
- 364 Carvajal-Rodríguez A, Uña-Alvarez J, Rolán-Alvarez E (2009) A new multitest correction  
365 (SGoF) that increases its statistical power when increasing the number of tests. *BMC*  
366 *Bioinformatics*, **10**, 209.
- 367 CBD (Convention on Biological Diversity) (2013) Major threats.
- 368 Chapman RE, Wang J, Bourke AFG (2003) Genetic analysis of spatial foraging patterns and  
369 resource sharing in bumble bee pollinators. *Molecular Ecology*, **12**, 2801–2808.
- 370 Cheng L, Connor TR, Sirén J, Aanensen DM, Corander J (2013) Hierarchical and spatially  
371 explicit clustering of DNA sequences with BAPS software. *Molecular Biology and*  
372 *Evolution*, **30**, 1224–1228.
- 373 Cook JM, Crozier RH (1995) Sex determination and population biology in the Hymenoptera.  
374 *Trends in Ecology and Evolution*, **10**, 281–286.
- 375 Corander J, Sirén J, Arjas E (2008) Bayesian spatial modeling of genetic population structure.  
376 *Computational Statistics*, **23**, 111–129.
- 377 Corrêa ICS (1996) Les variations du niveau de la mer durant les derniers 17.500 ans BP:



- 378 l'exemple de la plate-forme continentale du Rio Grande do Sul-Brésil. *Marine Geology*,  
379 **130**, 163–178.
- 380 Cortopassi-Laurino M, Imperatriz-Fonseca VL, Roubik DW *et al.* (2006) Global  
381 Meliponiculture: challenges and opportunities. *Apidologie*, **37**, 1–18.
- 382 Darvill B, Ellis JS, Lye GC, Goulson D (2006) Population structure and inbreeding in a rare  
383 and declining bumblebee, *Bombus muscorum* (Hymenoptera: Apidae). *Molecular*  
384 *Ecology*, **15**, 601–611.
- 385 Darvill B, O'Connor S, Lye GC *et al.* (2010) Cryptic differences in dispersal lead to  
386 differential sensitivity to habitat fragmentation in two bumblebee species. *Molecular*  
387 *Ecology*, **19**, 53–63.
- 388 Darwin C (1859) *On the Origin of Species by Means of Natural Selection, or the Preservation*  
389 *of Favoured Races in the Struggle for Life*. John Murray, London.
- 390 Diamond JM (1984) Historic extinctions: A rosetta stone for understanding prehistoric  
391 extinctions. In: *Quaternary Extinctions: A Prehistoric Revolution* (eds Martin PS, Klein  
392 RG), pp. 824–862. The University of Arizona Press, Tucson, AZ.
- 393 Dirzo R, Raven PH (2003) Global state of biodiversity and loss. *Annual Review of*  
394 *Environment and Resources*, **28**, 137–167.
- 395 Ellis JS, Knight ME, Darvill B, Goulson D (2006) Extremely low effective population sizes,  
396 genetic structuring and reduced genetic diversity in a threatened bumblebee species,  
397 *Bombus sylvarum* (Hymenoptera: Apidae). *Molecular Ecology*, **15**, 4375–4386.
- 398 Estoup A, Scholl A, Pouvreau A, Solignac M (1995) Monoandry and polyandry in bumble  
399 bees (Hymenoptera; Bombinae) as evidenced by highly variable microsatellites.  
400 *Molecular Ecology*, **4**, 89–93.
- 401 Estoup A, Solignac M, Cornuet J-M, Goudet J, Scholl A (1996) Genetic differentiation of  
402 continental and island populations of *Bombus terrestris* (Hymenoptera: Apidae) in  
403 Europe. *Molecular Ecology*, **5**, 19–31.
- 404 Excoffier L, Lischer HE (2010) Arlequin suite ver 3.5: a new series of programs to perform  
405 population genetics analyses under Linux and Windows. *Molecular Ecology Resources*,  
406 **10**, 564–567.
- 407 Francisco FO, Brito RM, Santiago LR *et al.* (2011) Isolation and characterization of 15  
408 microsatellite loci in the stingless bee *Plebeia remota* (Apidae: Meliponini).  
409 *Conservation Genetics Resources*, **3**, 417–419.
- 410 Francisco FO, Santiago LR, Brito RM, Oldroyd BP, Arias MC (2014) Hybridization and  
411 asymmetric introgression between *Tetragonisca angustula* and *Tetragonisca fiebrigi*.  
412 *Apidologie*, **45**, 1–9.
- 413 Frankham R (1997) Do island populations have less genetic variation than mainland

- 414 populations? *Heredity*, **78**, 311–327.
- 415 Frankham R (1998) Inbreeding and extinction: island populations. *Conservation Biology*, **12**,  
416 665–675.
- 417 Franks SJ (2010) Genetics, evolution, and conservation of island plants. *Journal of Plant*  
418 *Biology*, **53**, 1–9.
- 419 Funk CR, Schmid-Hempel R, Schmid-Hempel P (2006) Microsatellite loci for *Bombus* spp.  
420 *Molecular Ecology Notes*, **6**, 83–86.
- 421 Garófalo CA (1979) Observações preliminares sobre a fundação solitária de colônias de  
422 *Bombus (Fervidobombus) atratus* Franklin (Hymenoptera, Apidae). *Boletim de Zoologia*  
423 *da Universidade de São Paulo*, **4**, 53–64.
- 424 Garófalo CA, Zucchi R, Muccillo G (1986) Reproductive studies of a neotropical bumblebee,  
425 *Bombus atratus* (Hymenoptera, Apidae). *Revista Brasileira de Genética*, **9**, 231–243.
- 426 Gaston KJ (2009) Extinction. In: *Encyclopedia of Islands* (eds Gillespie RG, Clague DA), pp.  
427 281–286. University of California Press, Berkeley, CA.
- 428 Goulson D (2010) *Bumblebees: Behaviour, Ecology, and Conservation*. Oxford University  
429 Press, Oxford.
- 430 Goulson D, Kaden JC, Lepais O, Lye GC, Darvill B (2011) Population structure, dispersal  
431 and colonization history of the garden bumblebee *Bombus hortorum* in the Western Isles  
432 of Scotland. *Conservation Genetics*, **12**, 867–879.
- 433 Graziotin FG, Monzel M, Echeverrigaray S, Bonatto SL (2006) Phylogeography of the  
434 *Bothrops jararaca* complex (Serpentes: Viperidae): past fragmentation and island  
435 colonization in the Brazilian Atlantic Forest. *Molecular Ecology*, **15**, 3969–3982.
- 436 Heard TA (1999) The role of stingless bees in crop pollination. *Annual Review of*  
437 *Entomology*, **44**, 183–206.
- 438 Hines HM (2008) Historical biogeography, divergence times, and diversification patterns of  
439 bumble bees (Hymenoptera: Apidae: *Bombus*). *Systematic Biology*, **57**, 58–75.
- 440 Hooper DU, Adair EC, Cardinale BJ *et al.* (2012) A global synthesis reveals biodiversity loss  
441 as a major driver of ecosystem change. *Nature*, **486**, 105–108.
- 442 Jaenike JR (1973) A steady state model of genetic polymorphism on islands. *The American*  
443 *Naturalist*, **107**, 793–795.
- 444 Jones OR, Wang J (2010) colony: a program for parentage and sibship inference from  
445 multilocus genotype data. *Molecular Ecology Resources*, **10**, 551–555.
- 446 Jost L (2008)  $G_{ST}$  and its relatives do not measure differentiation. *Molecular Ecology*, **17**,  
447 4015–4026.
- 448 Kalinowski ST (2005) hp-rare 1.0: a computer program for performing rarefaction on

- 449 measures of allelic richness. *Molecular Ecology Notes*, **5**, 187–189.
- 450 Keller LF, Waller DM (2002) Inbreeding effects in wild populations. *Trends in Ecology and*  
451 *Evolution*, **17**, 230–241.
- 452 Kimura M (1980) A simple method for estimating evolutionary rates of base substitutions  
453 through comparative studies of nucleotide sequences. *Journal of Molecular Evolution*,  
454 **16**, 111–120.
- 455 Kraus FB, Wolf S, Moritz RFA (2009) Male flight distance and population substructure in the  
456 bumblebee *Bombus terrestris*. *Journal of Animal Ecology*, **78**, 247–252.
- 457 Laroca S (1976) Sobre a bionomia de *Bombus morio* (Hymenoptera, Apoidea). *Acta*  
458 *Biológica Paranaense*, **5**, 107–127.
- 459 Lozier JD, Cameron SA (2009) Comparative genetic analyses of historical and contemporary  
460 collections highlight contrasting demographic histories for the bumble bees *Bombus*  
461 *pensylvanicus* and *B. impatiens* in Illinois. *Molecular Ecology*, **18**, 1875–1886.
- 462 Lozier JD, Strange JP, Stewart IJ, Cameron SA (2011) Patterns of range-wide genetic  
463 variation in six North American bumble bee (Apidae: *Bombus*) species. *Molecular*  
464 *Ecology*, **20**, 4870–4888.
- 465 Lye GC, Lepais O, Goulson D (2011) Reconstructing demographic events from population  
466 genetic data: the introduction of bumblebees to New Zealand. *Molecular Ecology*, **20**,  
467 2888–2900.
- 468 MacArthur RH, Wilson EO (1967) *The Theory of Island Biogeography*. Princeton University  
469 Press, Princeton, NJ.
- 470 Macfarlane RP, Gurr L (1995) Distribution of bumble bees in New Zealand. *New Zealand*  
471 *Entomologist*, **18**, 29–36.
- 472 Mayr E (1942) *Systematics and the Origin of Species*. Columbia University Press, New York,  
473 NY.
- 474 Mayr E (1967) The challenge of island faunas. *Australian Natural History*, **15**, 369–374.
- 475 Michener CD (2007) *The Bees of the World*. Johns Hopkins University Press, Baltimore, MD.
- 476 Molecular Ecology Resources Primer Development Consortium, Arias MC, Arnoux E *et al.*  
477 (2012) Permanent Genetic Resources added to Molecular Ecology Resources Database 1  
478 December 2011 - 31 January 2012. *Molecular Ecology Resources*, **12**, 570–572.
- 479 Moreira AS, Horgan FG, Murray TE, Kakouli-Duarte T (2015) Population genetic structure  
480 of *Bombus terrestris* in Europe: Isolation and genetic differentiation of Irish and  
481 British populations. *Molecular Ecology*, **24**, 3257–2368.
- 482 Moure JS, Sakagami SF (1962) As mamangabas sociais do Brasil (*Bombus* Latreille)  
483 (Hymenoptera, Apoidea). *Studia Entomologica*, **51**, 65–194.

- 484 van Oosterhout C, Hutchinson WF, Wills DPM, Shipley P (2004) micro-checker: software for  
485 identifying and correcting genotyping errors in microsatellite data. *Molecular Ecology*  
486 *Notes*, **4**, 535–538.
- 487 Peakall R, Smouse PE (2006) genalex 6: genetic analysis in Excel. Population genetic  
488 software for teaching and research. *Molecular Ecology Notes*, **6**, 288–295.
- 489 Peakall R, Smouse PE (2012) GenAlEx 6.5: Genetic analysis in Excel. Population genetic  
490 software for teaching and research – an update. *Bioinformatics*, **28**, 2537–2539.
- 491 Pellegrino KCM, Rodrigues MT, Waite AN *et al.* (2005) Phylogeography and species limits  
492 in the *Gymnodactylus darwinii* complex (Gekkonidae, Squamata): genetic structure  
493 coincides with river systems in the Brazilian Atlantic Forest. *Biological Journal of the*  
494 *Linnean Society*, **85**, 13–26.
- 495 Rocha-Filho LC, Cerântola NCM, Garófalo CA, Imperatriz-Fonseca VL, Del Lama MA  
496 (2013) Genetic differentiation of the Euglossini (Hymenoptera, Apidae) populations on a  
497 mainland coastal plain and an island in southeastern Brazil. *Genetica*, **141**, 65–74.
- 498 Rousset F (2008) genepop'007: a complete re-implementation of the genepop software for  
499 Windows and Linux. *Molecular Ecology Resources*, **8**, 103–106.
- 500 Schmid-Hempel P, Schmid-Hempel R, Brunner PC, Seeman OD, Allen GR (2007) Invasion  
501 success of the bumblebee, *Bombus terrestris*, despite a drastic genetic bottleneck.  
502 *Heredity*, **99**, 414–422.
- 503 Shaffer ML (1981) Minimum population sizes for species conservation. *BioScience*, **31**, 131–  
504 134.
- 505 Shao Z-Y, Mao H-X, Fu W-J *et al.* (2004) Genetic structure of Asian populations of *Bombus*  
506 *ignitus* (Hymenoptera: Apidae). *Journal of Heredity*, **95**, 46–52.
- 507 Steffan-Dewenter I, Westphal C (2008) The interplay of pollinator diversity, pollination  
508 services and landscape change. *Journal of Applied Ecology*, **45**, 737–741.
- 509 Stokstad E (2006) Global loss of biodiversity harming ocean bounty. *Science*, **314**, 745.
- 510 Suguio K, Angulo RJ, Carvalho AM *et al.* (2005) Paleoníveis do mar e paleolinhas de costa.  
511 In: *Quaternário do Brasil* (eds Souza CRG, Suguio K, Oliveira AMS, Oliveira PE), pp.  
512 114–129. Associação Brasileira de Estudos do Quaternário, São Paulo.
- 513 Suguio K, Tatumi SH, Kowata EA, Munita CS, Paiva RP (2003) Upper Pleistocene deposits  
514 of the Comprida Island (São Paulo State) dated by thermoluminescence method. *Anais*  
515 *da Academia Brasileira de Ciências*, **75**, 91–96.
- 516 Tamura K, Peterson D, Peterson N *et al.* (2011) MEGA5: Molecular Evolutionary Genetics  
517 Analysis using maximum likelihood, evolutionary distance, and maximum parsimony  
518 methods. *Molecular Biology and Evolution*, **28**, 2731–2739.
- 519 Wallace AR (1869) *The Malay Archipelago, the land of the orang-utan and the bird of*

- 520 *paradise; a narrative of travel, with studies of man and nature. Vol I.* Macmillan,  
521 London.
- 522 Walsh PS, Metzger DA, Higuchi R (1991) Chelex 100 as a medium for simple extraction of  
523 DNA for PCR-based typing from forensic material. *BioTechniques*, **10**, 506–513.
- 524 Whitehorn PR, Tinsley MC, Brown MJF, Darvill B, Goulson D (2011) Genetic diversity,  
525 parasite prevalence and immunity in wild bumblebees. *Proceedings of the Royal Society*  
526 *B*, **278**, 1195–202.
- 527 Widmer A, Schmid-Hempel P, Estoup A, Scholl A (1998) Population genetic structure and  
528 colonization history of *Bombus terrestris* s.l. (Hymenoptera: Apidae) from the Canary  
529 Islands and Madeira. *Heredity*, **81**, 563–572.
- 530 Wright S (1931) Evolution in mendelian populations. *Genetics*, **16**, 97–159.
- 531 Zayed A, Packer L (2005) Complementary sex determination substantially increases  
532 extinction proneness of haplodiploid populations. *Proceedings of the National Academy*  
533 *of Sciences of the United States of America*, **102**, 10742–10746.
- 534

535 **Table 1.** Population characteristics and genetic diversity in *Bombus morio* populations. SA: sampled area in square kilometers. ME: median  
 536 elevation in meters. N: sample size. NH: number of haplotypes.  $h \pm sd$ : haplotype diversity and standard deviation.  $\pi \pm sd$ : nucleotide diversity  
 537 and standard deviation.  $Ar \pm se$ : allelic richness after rarefaction for 5 individuals and standard error.  $H_E \pm se$ : expected heterozygosity and  
 538 standard error.  $F_{IS}$ : inbreeding coefficient.

| Location               | Population                   | SA<br>(km <sup>2</sup> ) | DM<br>(km) | ME (m) | N  | NH            | $h \pm sd$      | $\pi \pm sd$    | $Ar \pm se$   | $H_E \pm se$          | $F_{IS}$              |
|------------------------|------------------------------|--------------------------|------------|--------|----|---------------|-----------------|-----------------|---------------|-----------------------|-----------------------|
| Mainland               | Teresópolis (TERE)           | 160                      |            | 895    | 20 | 6             | 0.574 ± 0.122   | 0.0318 ± 0.0211 | 4.65 ± 0.38   | 0.731 ± 0.036         | 0.0529 <sup>ns</sup>  |
|                        | Resende (RESE)               | 40                       |            | 452    | 27 | 11            | 0.903 ± 0.030   | 0.0447 ± 0.0273 | 4.61 ± 0.42   | 0.723 ± 0.040         | 0.0095 <sup>ns</sup>  |
|                        | Passa Quatro (PASQ)          | 199                      |            | 923    | 23 | 10            | 0.913 ± 0.028   | 0.0494 ± 0.0299 | 4.73 ± 0.45   | 0.723 ± 0.049         | 0.0124 <sup>ns</sup>  |
|                        | Angra dos Reis (ANGR)        | 1541                     |            | 17     | 47 | 23            | 0.958 ± 0.012   | 0.0540 ± 0.0315 | 4.79 ± 0.37   | 0.745 ± 0.035         | 0.0618**              |
|                        | São Sebastião (SSEB)         | 137                      |            | 16     | 54 | 16            | 0.930 ± 0.012   | 0.0490 ± 0.0290 | 4.74 ± 0.37   | 0.744 ± 0.035         | 0.0330 <sup>ns</sup>  |
|                        | Iguaape (GUAP)               | 109                      |            | 6      | 28 | 15            | 0.894 ± 0.043   | 0.0441 ± 0.0202 | 4.74 ± 0.37   | 0.737 ± 0.038         | 0.0249 <sup>ns</sup>  |
|                        | Apiáí (APIA)                 | 293                      |            | 482    | 20 | 14            | 0.963 ± 0.025   | 0.0530 ± 0.0319 | 4.85 ± 0.38   | 0.742 ± 0.035         | 0.0963**              |
|                        | Guaratuba (GUAR)             | 396                      |            | 14     | 20 | 15            | 0.968 ± 0.025   | 0.0466 ± 0.0287 | 4.77 ± 0.38   | 0.740 ± 0.039         | 0.0411 <sup>ns</sup>  |
|                        | Blumenau (BLUM)              | 314                      |            | 53     | 21 | 12            | 0.943 ± 0.027   | 0.0448 ± 0.0277 | 4.66 ± 0.35   | 0.728 ± 0.042         | 0.0101 <sup>ns</sup>  |
|                        | São José (SJOS)              | 1296                     |            | 13     | 57 | 17            | 0.933 ± 0.013   | 0.0488 ± 0.0288 | 4.60 ± 0.35   | 0.729 ± 0.036         | -0.0177 <sup>ns</sup> |
|                        | Prudentópolis (PRUD)         | 900                      |            | 858    | 26 | 16            | 0.948 ± 0.027   | 0.0416 ± 0.0258 | 4.70 ± 0.40   | 0.727 ± 0.045         | 0.0634*               |
|                        | Porto União (PUNI)           | 18                       |            | 762    | 17 | 7             | 0.875 ± 0.044   | 0.0407 ± 0.0259 | 4.39 ± 0.34   | 0.706 ± 0.038         | -0.0233 <sup>ns</sup> |
|                        | Foz do Iguaçu (FOZI)         | 4556                     |            | 271    | 23 | 12            | 0.901 ± 0.041   | 0.0429 ± 0.0266 | 4.70 ± 0.40   | 0.733 ± 0.041         | 0.0812**              |
| Teodoro Sampaio (TSAM) | 3481                         |                          | 416        | 16     | 3  | 0.242 ± 0.135 | 0.0176 ± 0.0138 | 3.73 ± 0.43     | 0.558 ± 0.070 | 0.1033**              |                       |
| Island                 | Ilha Grande (IGRA)           | 193 <sup>▲</sup>         | 2.00       | 11     | 60 | 14            | 0.870 ± 0.023   | 0.0414 ± 0.0251 | 4.74 ± 0.38   | 0.747 ± 0.036         | 0.0414*               |
|                        | Ilha Anchieta (IANC)         | 8.28 <sup>▲</sup>        | 0.49       | 14     | 16 | 10            | 0.917 ± 0.049   | 0.0587 ± 0.0353 | 4.86 ± 0.36   | 0.742 ± 0.030         | 0.0093 <sup>ns</sup>  |
|                        | Ilha do Tamanduá (ITMD)      | 1.11 <sup>▲</sup>        | 0.54       | 8      | 5  | 4             | 0.900 ± 0.161   | 0.0333 ± 0.0262 | 4.71 ± 0.42   | 0.693 ± 0.035         | 0.0185 <sup>ns</sup>  |
|                        | Ilha de São Sebastião (IBEL) | 335.93 <sup>▲</sup>      | 1.76       | 22     | 51 | 16            | 0.915 ± 0.018   | 0.0492 ± 0.0291 | 4.72 ± 0.36   | 0.745 ± 0.036         | 0.0490**              |
|                        | Ilha de Búzios (IBUZ)        | 7.55 <sup>▲</sup>        | 24.09      | 12     | 12 | 4             | 0.561 ± 0.154   | 0.0346 ± 0.0234 | 4.48 ± 0.40   | 0.700 ± 0.041         | 0.0152 <sup>ns</sup>  |
|                        | Ilha da Vitória (IVIT)       | 2.21 <sup>▲</sup>        | 37.97      | 77     | 5  | 1             | 0.000 ± 0.000   | 0.0000 ± 0.0000 | 3.29 ± 0.22   | 0.581 ± 0.037         | -0.1204 <sup>ns</sup> |
|                        | Ilha Monte de Trigo (IMTG)   | 200 <sup>▲</sup>         | 0.31       | 0      | 21 | 10            | 0.890 ± 0.046   | 0.0462 ± 0.0284 | 4.65 ± 0.36   | 0.735 ± 0.034         | 0.1030**              |
|                        | Ilha Comprida (ICOM)         | 225 <sup>▲</sup>         | 0.08       | 12     | 21 | 10            | 0.809 ± 0.080   | 0.0373 ± 0.0239 | 4.68 ± 0.36   | 0.714 ± 0.047         | 0.0103 <sup>ns</sup>  |
|                        | Ilha do Cardoso (ICAR)       | 27.62 <sup>▲</sup>       | 2.70       | 15     | 20 | 6             | 0.779 ± 0.065   | 0.0216 ± 0.0157 | 4.53 ± 0.33   | 0.721 ± 0.035         | 0.0602*               |
| Ilha do Mel (IMEL)     | 451 <sup>▲</sup>             | 0.50                     | 11         | 49     | 16 | 0.899 ± 0.021 | 0.0480 ± 0.0285 | 4.55 ± 0.35     | 0.719 ± 0.039 | -0.0041 <sup>ns</sup> |                       |

539 <sup>▲</sup>: island area; <sup>ns</sup>: not significant; \*:  $P < 0.05$ ; \*\*:  $P < 0.01$

540 **Table 2.** Estimates of evolutionary divergence of mitochondrial DNA sequence pairs between populations of *Bombus morio*. The number of base  
541 substitutions per site obtained from averaging over all sequence pairs between populations are shown. Analyses were conducted using the  
542 Kimura 2-parameter model (Kimura, 1980) and involved 659 nucleotide sequences. Population abbreviations as in Table 1.

|      | TERE  | RESE  | PASQ  | ANGR  | IGRA  | IANC  | ITMD  | SSEB  | IBEL  | IBUZ  | IVIT  | GUAP  | ICOM  | ICAR  | APIA  | GUAR  | IMEL  | BLUM  | SJOS  | ISCA  | PRUD  | PUNI  | FOZI  |
|------|-------|-------|-------|-------|-------|-------|-------|-------|-------|-------|-------|-------|-------|-------|-------|-------|-------|-------|-------|-------|-------|-------|-------|
| RESE | 0.005 |       |       |       |       |       |       |       |       |       |       |       |       |       |       |       |       |       |       |       |       |       |       |
| PASQ | 0.005 | 0.004 |       |       |       |       |       |       |       |       |       |       |       |       |       |       |       |       |       |       |       |       |       |
| ANGR | 0.005 | 0.004 | 0.004 |       |       |       |       |       |       |       |       |       |       |       |       |       |       |       |       |       |       |       |       |
| IGRA | 0.005 | 0.004 | 0.004 | 0.004 |       |       |       |       |       |       |       |       |       |       |       |       |       |       |       |       |       |       |       |
| IANC | 0.005 | 0.004 | 0.004 | 0.004 | 0.004 |       |       |       |       |       |       |       |       |       |       |       |       |       |       |       |       |       |       |
| ITMD | 0.004 | 0.003 | 0.004 | 0.004 | 0.003 | 0.004 |       |       |       |       |       |       |       |       |       |       |       |       |       |       |       |       |       |
| SSEB | 0.006 | 0.004 | 0.004 | 0.004 | 0.004 | 0.004 | 0.004 |       |       |       |       |       |       |       |       |       |       |       |       |       |       |       |       |
| IBEL | 0.006 | 0.004 | 0.004 | 0.004 | 0.004 | 0.004 | 0.004 | 0.004 |       |       |       |       |       |       |       |       |       |       |       |       |       |       |       |
| IBUZ | 0.004 | 0.003 | 0.003 | 0.004 | 0.003 | 0.004 | 0.002 | 0.004 | 0.004 |       |       |       |       |       |       |       |       |       |       |       |       |       |       |
| IVIT | 0.003 | 0.003 | 0.003 | 0.003 | 0.002 | 0.003 | 0.001 | 0.003 | 0.003 | 0.002 |       |       |       |       |       |       |       |       |       |       |       |       |       |
| GUAP | 0.005 | 0.003 | 0.004 | 0.004 | 0.003 | 0.004 | 0.003 | 0.004 | 0.004 | 0.003 | 0.003 |       |       |       |       |       |       |       |       |       |       |       |       |
| ICOM | 0.004 | 0.004 | 0.004 | 0.004 | 0.004 | 0.004 | 0.003 | 0.004 | 0.004 | 0.003 | 0.003 | 0.004 |       |       |       |       |       |       |       |       |       |       |       |
| ICAR | 0.004 | 0.004 | 0.004 | 0.004 | 0.003 | 0.004 | 0.003 | 0.004 | 0.004 | 0.003 | 0.002 | 0.003 | 0.003 |       |       |       |       |       |       |       |       |       |       |
| APIA | 0.005 | 0.004 | 0.004 | 0.004 | 0.004 | 0.004 | 0.004 | 0.004 | 0.004 | 0.004 | 0.003 | 0.004 | 0.004 | 0.004 |       |       |       |       |       |       |       |       |       |
| GUAR | 0.005 | 0.004 | 0.004 | 0.004 | 0.004 | 0.004 | 0.003 | 0.004 | 0.004 | 0.003 | 0.003 | 0.004 | 0.004 | 0.004 | 0.004 |       |       |       |       |       |       |       |       |
| IMEL | 0.004 | 0.003 | 0.003 | 0.003 | 0.003 | 0.003 | 0.002 | 0.003 | 0.003 | 0.002 | 0.001 | 0.003 | 0.003 | 0.002 | 0.003 | 0.003 |       |       |       |       |       |       |       |
| BLUM | 0.005 | 0.003 | 0.004 | 0.004 | 0.004 | 0.004 | 0.003 | 0.004 | 0.004 | 0.003 | 0.003 | 0.003 | 0.004 | 0.003 | 0.004 | 0.003 | 0.003 |       |       |       |       |       |       |
| SJOS | 0.004 | 0.004 | 0.004 | 0.004 | 0.004 | 0.004 | 0.003 | 0.004 | 0.004 | 0.003 | 0.003 | 0.004 | 0.004 | 0.003 | 0.004 | 0.004 | 0.003 | 0.004 |       |       |       |       |       |
| ISCA | 0.005 | 0.004 | 0.004 | 0.004 | 0.004 | 0.004 | 0.003 | 0.004 | 0.004 | 0.003 | 0.003 | 0.004 | 0.004 | 0.003 | 0.004 | 0.004 | 0.003 | 0.004 | 0.004 |       |       |       |       |
| PRUD | 0.005 | 0.003 | 0.004 | 0.004 | 0.004 | 0.004 | 0.004 | 0.004 | 0.004 | 0.004 | 0.003 | 0.003 | 0.004 | 0.004 | 0.004 | 0.003 | 0.003 | 0.003 | 0.004 | 0.004 |       |       |       |
| PUNI | 0.005 | 0.003 | 0.004 | 0.004 | 0.004 | 0.004 | 0.004 | 0.004 | 0.004 | 0.003 | 0.003 | 0.003 | 0.004 | 0.004 | 0.004 | 0.004 | 0.003 | 0.004 | 0.004 | 0.004 | 0.003 |       |       |
| FOZI | 0.005 | 0.003 | 0.004 | 0.004 | 0.004 | 0.004 | 0.003 | 0.004 | 0.004 | 0.003 | 0.003 | 0.003 | 0.004 | 0.003 | 0.004 | 0.003 | 0.003 | 0.003 | 0.004 | 0.004 | 0.003 | 0.003 |       |
| TSAM | 0.021 | 0.024 | 0.024 | 0.024 | 0.024 | 0.025 | 0.024 | 0.025 | 0.025 | 0.025 | 0.024 | 0.024 | 0.023 | 0.023 | 0.025 | 0.024 | 0.023 | 0.024 | 0.024 | 0.024 | 0.024 | 0.025 | 0.024 |

543

**Table 3.** Pairwise index of differentiation ( $D_{est}$ ) from microsatellite data of *Bombus morio*. Population abbreviations as in Table 1.

|      | TERE  | RESE    | PASQ   | ANGR   | IGRA    | IANC    | ITMD   | SSEB    | IBEL    | IBUZ    | IVIT  | GUAP    | ICOM    | ICAR    | APIA    | GUAR    | IMEL   | BLUM   | SJOS    | ISCA  | PRUD    | PUNI   | FOZI  |  |
|------|-------|---------|--------|--------|---------|---------|--------|---------|---------|---------|-------|---------|---------|---------|---------|---------|--------|--------|---------|-------|---------|--------|-------|--|
| RESE | 0.017 |         |        |        |         |         |        |         |         |         |       |         |         |         |         |         |        |        |         |       |         |        |       |  |
| PASQ | 0.047 | -0.004* |        |        |         |         |        |         |         |         |       |         |         |         |         |         |        |        |         |       |         |        |       |  |
| ANGR | 0.052 | 0.016   | 0.021  |        |         |         |        |         |         |         |       |         |         |         |         |         |        |        |         |       |         |        |       |  |
| IGRA | 0.042 | 0.008*  | 0.013* | 0.011  |         |         |        |         |         |         |       |         |         |         |         |         |        |        |         |       |         |        |       |  |
| IANC | 0.048 | 0.007*  | 0.016* | 0.008* | -0.001* |         |        |         |         |         |       |         |         |         |         |         |        |        |         |       |         |        |       |  |
| ITMD | 0.123 | 0.093   | 0.110  | 0.024* | 0.041*  | -0.026* |        |         |         |         |       |         |         |         |         |         |        |        |         |       |         |        |       |  |
| SSEB | 0.055 | 0.009*  | 0.023  | 0.021  | 0.012   | -0.005* | 0.028* |         |         |         |       |         |         |         |         |         |        |        |         |       |         |        |       |  |
| IBEL | 0.048 | 0.003*  | 0.024  | 0.007* | 0.009*  | 0.012*  | 0.032* | 0.002*  |         |         |       |         |         |         |         |         |        |        |         |       |         |        |       |  |
| IBUZ | 0.042 | -0.011* | 0.004* | 0.009* | 0.004*  | -0.017* | 0.038* | -0.011* | -0.012* |         |       |         |         |         |         |         |        |        |         |       |         |        |       |  |
| IVIT | 0.323 | 0.276   | 0.259  | 0.236  | 0.278   | 0.247   | 0.244  | 0.252   | 0.266   | 0.227   |       |         |         |         |         |         |        |        |         |       |         |        |       |  |
| GUAP | 0.058 | 0.010*  | 0.026  | 0.014* | 0.006*  | -0.004* | 0.027* | 0.003*  | 0.005*  | -0.009* | 0.296 |         |         |         |         |         |        |        |         |       |         |        |       |  |
| ICOM | 0.062 | 0.009*  | 0.037  | 0.013* | 0.012*  | -0.013* | 0.005* | -0.007* | 0.002*  | -0.030* | 0.218 | -0.010* |         |         |         |         |        |        |         |       |         |        |       |  |
| ICAR | 0.078 | 0.015*  | 0.032  | 0.014* | 0.018   | 0.001*  | 0.036* | 0.002*  | 0.001*  | -0.013* | 0.245 | -0.006* | 0.007*  |         |         |         |        |        |         |       |         |        |       |  |
| APIA | 0.048 | -0.006* | 0.025  | 0.024  | -0.004* | -0.011* | 0.011* | 0.005*  | -0.003* | -0.016* | 0.280 | -0.015* | -0.017* | -0.005* |         |         |        |        |         |       |         |        |       |  |
| GUAR | 0.075 | 0.019*  | 0.036  | 0.023  | 0.011*  | 0.003*  | 0.038* | 0.023   | 0.010*  | 0.013*  | 0.322 | -0.007* | 0.007*  | 0.003*  | -0.027* |         |        |        |         |       |         |        |       |  |
| IMEL | 0.062 | 0.018*  | 0.049  | 0.026  | 0.015*  | 0.003*  | 0.043* | 0.007*  | 0.013*  | -0.010* | 0.299 | -0.001* | 0.002*  | 0.003*  | -0.012* | 0.011*  |        |        |         |       |         |        |       |  |
| BLUM | 0.060 | 0.031   | 0.032  | 0.025  | 0.017   | 0.012*  | 0.078  | 0.021   | 0.013*  | 0.000*  | 0.275 | 0.004*  | 0.013*  | 0.007*  | 0.009*  | -0.005* | 0.012* |        |         |       |         |        |       |  |
| SJOS | 0.066 | 0.027   | 0.058  | 0.034  | 0.026   | 0.023   | 0.062  | 0.017   | 0.016   | 0.014*  | 0.283 | 0.012*  | 0.014*  | 0.002*  | 0.011*  | 0.020   | 0.007* | 0.000* |         |       |         |        |       |  |
| ISCA | 0.098 | 0.050   | 0.078  | 0.053  | 0.044   | 0.043   | 0.081  | 0.026   | 0.025   | 0.021*  | 0.286 | 0.030   | 0.029   | 0.007*  | 0.030   | 0.034   | 0.012* | 0.002* | -0.008* |       |         |        |       |  |
| PRUD | 0.060 | 0.030   | 0.018* | 0.014* | 0.030   | 0.037   | 0.073  | 0.025   | 0.016   | -0.007* | 0.293 | 0.019   | 0.023*  | 0.022   | 0.017*  | 0.021*  | 0.045  | 0.033  | 0.048   | 0.057 |         |        |       |  |
| PUNI | 0.076 | 0.038   | 0.030  | 0.023  | 0.039   | 0.013*  | 0.052* | 0.018*  | 0.034   | 0.030*  | 0.255 | 0.015*  | 0.018*  | 0.019*  | 0.038   | 0.038   | 0.048  | 0.056  | 0.055   | 0.077 | 0.043   |        |       |  |
| FOZI | 0.052 | 0.001*  | 0.023  | 0.015* | 0.025   | 0.016*  | 0.063  | 0.016*  | 0.007*  | -0.010* | 0.311 | 0.002*  | 0.005*  | 0.023   | -0.001* | 0.003*  | 0.019* | 0.034  | 0.048   | 0.055 | -0.009* | 0.024* |       |  |
| TSAM | 0.327 | 0.261   | 0.308  | 0.231  | 0.276   | 0.240   | 0.252  | 0.286   | 0.264   | 0.262   | 0.385 | 0.255   | 0.238   | 0.255   | 0.244   | 0.264   | 0.267  | 0.301  | 0.306   | 0.309 | 0.249   | 0.230  | 0.245 |  |

Colours highlight  $D_{est}$  values. Green:  $D_{est} < 0.05$ ; yellow:  $0.05 < D_{est} < 0.15$ ; orange:  $0.15 < D_{est} < 0.25$ ; red:  $D_{est} > 0.25$ ; \*  $P > 0.05$ ; values without asterisk  $P < 0.05$ .



547 **Figure legend**

548

549 **Figure 1.** Posterior probability assignment (vertical axis) of individual genotypes (horizontal  
550 axis) for  $K = 2$  in *Bombus morio* according to the program BAPS (upper panel). Below, map of  
551 the studied area with the approximate location of the sampled populations. Population names  
552 are 1: Teresópolis, 2: Resende, 3: Passa Quatro, 4: Angra dos Reis, 5: Ilha Grande, 6: Ilha  
553 Anchieta, 7: Ilha do tamanduá, 8: São Sebastião, 9: Ilha de São Sebastião, 10: Ilha de Búzios,  
554 11: Ilha da Vitória, 12: Iguape, 13: Ilha Comprida, 14: Ilha do Cardoso, 15: Apiaí, 16:  
555 Guaratuba, 17: Ilha do Mel, 18: Blumenau, 19: São José, 20: Ilha de Santa Catarina, 21:  
556 Prudentópolis, 22: Porto União, 23: Foz do Iguaçu, and 24: Teodoro Sampaio. Detailed  
557 location of the islands visited (lower panels). IGRA: Ilha Grande; IANC: Ilha Anchieta;  
558 ITMD: Ilha do Tamanduá; IVIT: Ilha da Vitória; IBUZ: Ilha de Búzios; IBEL: Ilha de São  
559 Sebastião; IMTG: Ilha Monte de Trigo. ICOM: Ilha Comprida; ICAR: Ilha do Cardoso;  
560 IMEL: Ilha do Mel. ISCA: Ilha de Santa Catarina.

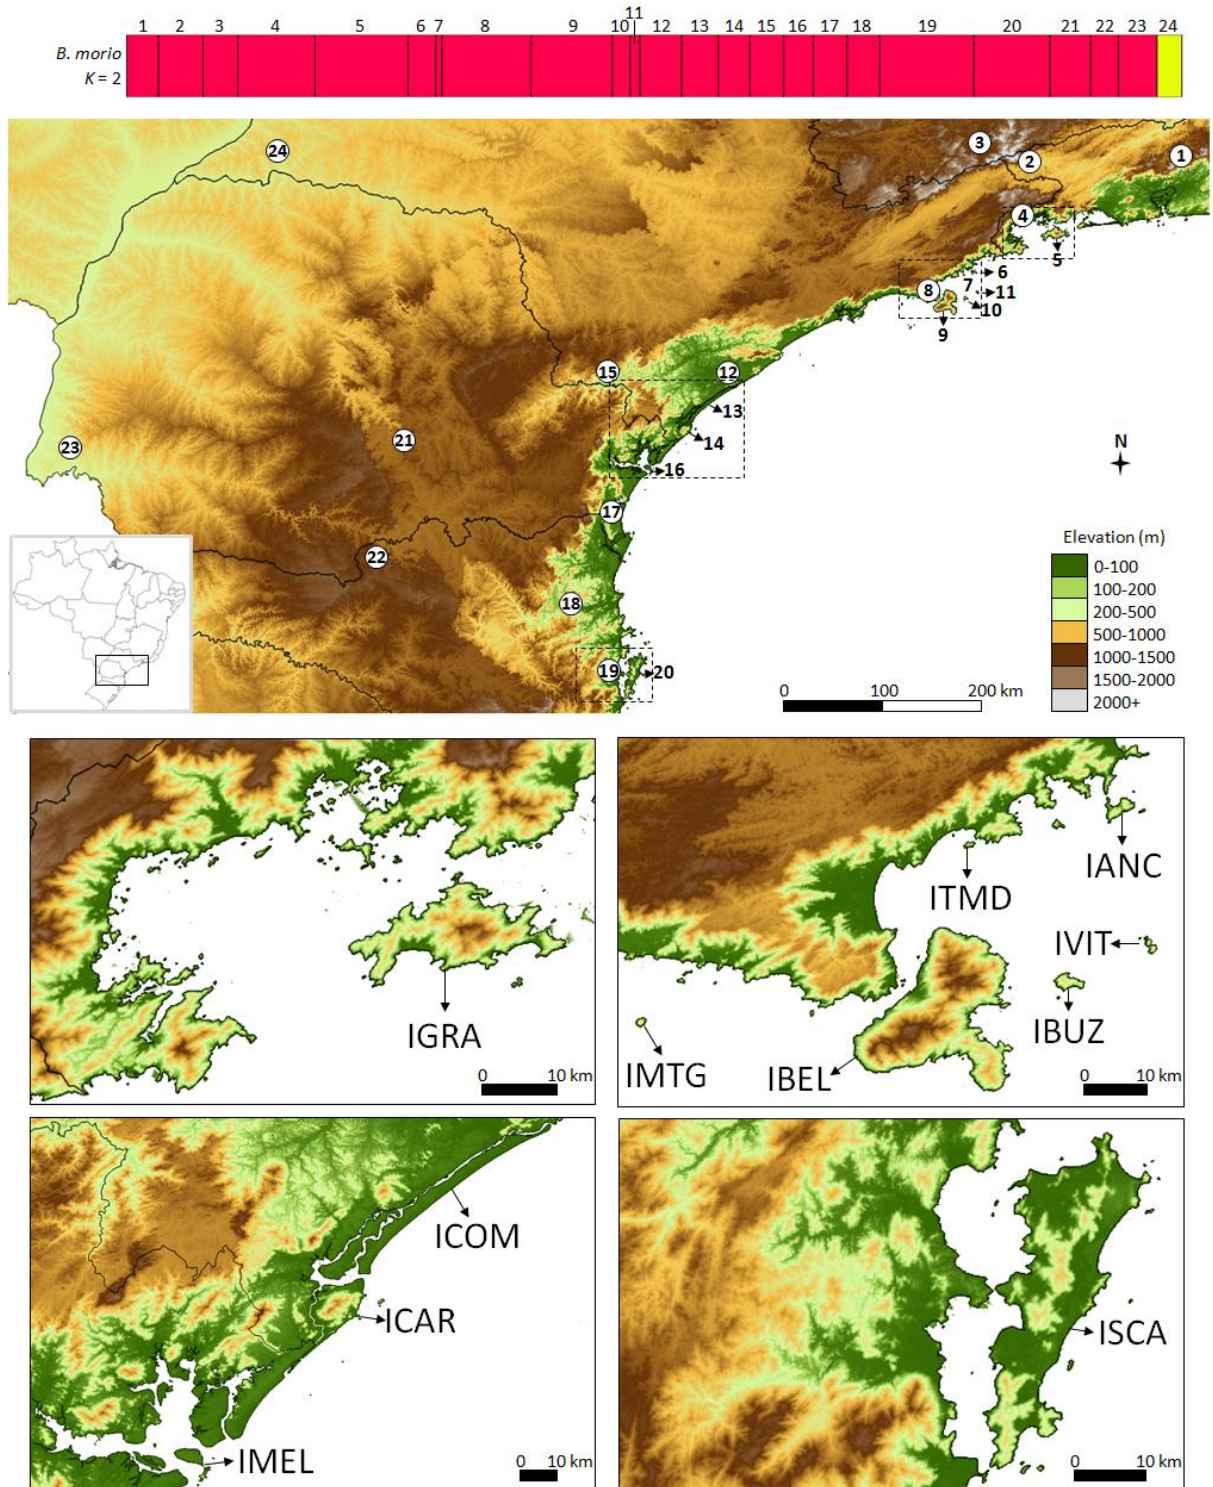

Source: https://www.biorxiv.org/content/biorxiv/early/2015/09/29/027813.full.pdf
